# Supplementary material
Source: publisher figshare collection journal article supplement (https://acs.figshare.com/ndownloader/files/9262438)
Supplement: Supplementary file 1 [file 9262438]

## Supporting Information

### **Concave Silica Nanosphere with a Functionalized Open-Mouthed Cavity as Highly Active and Durable Catalytic Nanoreactor**

Jin Goo Kim,<sup>†,‡,§</sup> Amit Kumar,<sup>†,‡,§</sup> Seung Jin Lee,<sup>†,‡</sup> Junghoon Kim,<sup>‡</sup> Dong-Gyu Lee,<sup>†,‡</sup> Taewan Kwon,<sup>†,‡</sup> Seung Hwan Cho,<sup>‡</sup> and In Su Lee<sup>\*,†,‡</sup>

<sup>†</sup>National Creative Research Initiative Center for Nanospace-confined Chemical Reactions (NCCRs) and

<sup>‡</sup>Department of Chemistry, Pohang University of Science and Technology (POSTECH), Pohang 37673, Korea

\*To whom correspondence should be addressed

e-mail: [insulee97@postech.ac.kr](mailto:insulee97@postech.ac.kr) (I. S. L.)

<sup>§</sup>These authors contributed equally to this work and both should be considered as the first author.

**X-ray Photoelectron Spectroscopy (XPS):** XPS measurements were performed on a PHI versaprobe system, using a monochromatic Al K $\alpha$  source. High-resolution narrow scans were performed at constant pass energy of 58.7 eV and steps of 0.1 eV. The photoelectrons were detected at a takeoff angle of  $\Phi = 45^\circ$  with respect to the surface normal. The pressure in the analysis chamber was maintained below  $2.4 \times 10^{-9}$  Torr for data acquisition. The data were converted to VAMAS format and processed using Multipak software. The binding energy (BE) scale was internally referenced to the C 1s peak (BE for C–C = 284.8 eV).

**Brunauer–Emmett–Teller (BET) Surface Properties Measurements:** N<sub>2</sub> adsorption–desorption analysis was carried out using a Micromeritics ASAP 2020 at Korea Basic Science Institute (Dr. Sang Moon Lee). The typical sample weight used was 50–100 mg. The outgas condition was set to 100 °C under vacuum for overnight, and all adsorption–desorption measurements were carried out at liquid nitrogen temperature (–196 °C). The original DFT method for the slit pore geometry was used to extract the pore size distribution from the adsorption branch using the Micromeritics software.<sup>1–4</sup> A Horvath-Kawazoe method was used to extract the microporosity.<sup>5</sup> Barret-Joyner-Halenda model (BJH) method was used to extract the mesoprosity.<sup>6</sup>

**X-Ray Diffraction (XRD) Analysis:** Powder X-ray diffraction patterns were obtained using an X-ray diffractometer (18 kW, Rigaku, Japan).

(1) Balbuena, P. B.; Gubbins, K. E. Classification of adsorption behavior: simple fluids in pores of slit-shaped geometry, *Fluid Phase Equilibria* **1992**, 76, 21–35.

(2) Olivier, J. P. Modeling physical adsorption on porous and nonporous solids using density functional theory, *J. Porous Mater.* **1995**, 2, 9–17.

(3) Maddox, M. W.; Olivier, J. P.; Gubbins, K. E. Characterization of MCM-41 using molecular simulation: Heterogeneity effects, *Langmuir* **1997**, 13, 1737–1745.

(4) Olivier, J. P. Improving the models used for calculating the size distribution of micropore volume of activated carbons from adsorption data, *Carbon* **1998**, 36, 1469–1472.

(5) Horvath, G.; Kawazoe, K. Method for the calculation of effective pore size distribution in molecular sieve carbon, *J. Chem. Eng. Jpn.* **1983**, 16, 470–475.

(6) Barrett, E. P.; Joyner, L.G.; Halenda, P.P. The determination of pore volume and area distributions in porous substances. I. Computations from Nitrogen Isotherms, *J. Am. Chem. Soc.* **1951**, 73, 373–380.

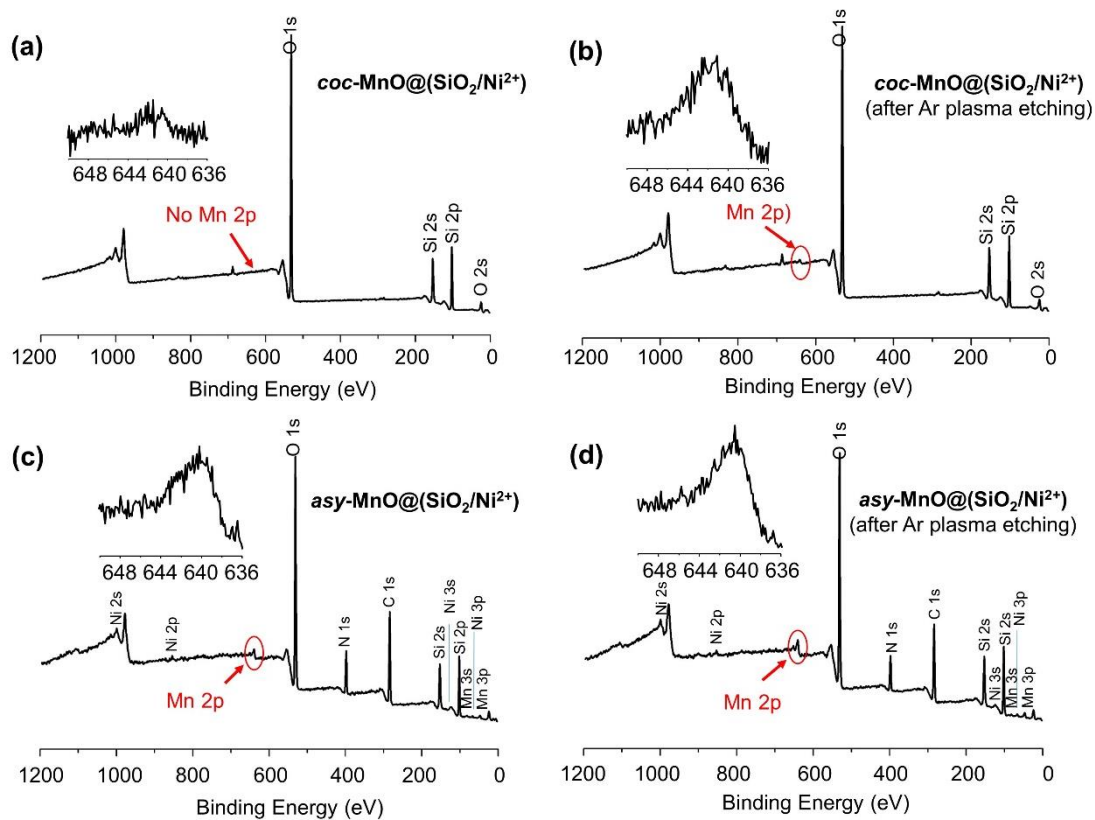

**Figure S1.** XPS analysis of *coc*-MnO@(SiO<sub>2</sub>/Ni<sup>2+</sup>) and *asy*-MnO@(SiO<sub>2</sub>/Ni<sup>2+</sup>) before and after Ar plasma etching. Graphs shown in the insets represent high resolution Mn 2p profiling.

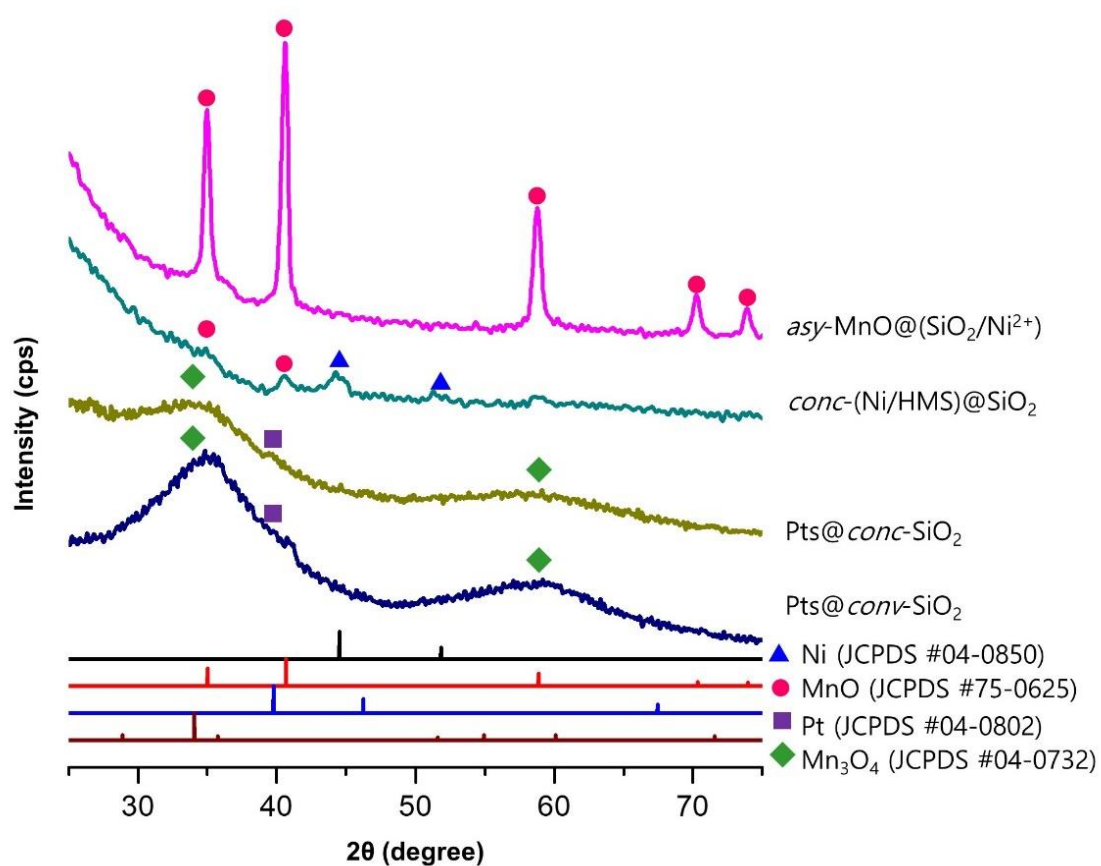

**Figure S2.** XRD patterns of *asy*-MnO@(SiO<sub>2</sub>/Ni<sup>2+</sup>), *conc*-(Ni/HMS)@SiO<sub>2</sub>, Pt@*conc*-SiO<sub>2</sub> and Pt@*conv*-SiO<sub>2</sub> and their comparison with standard data.

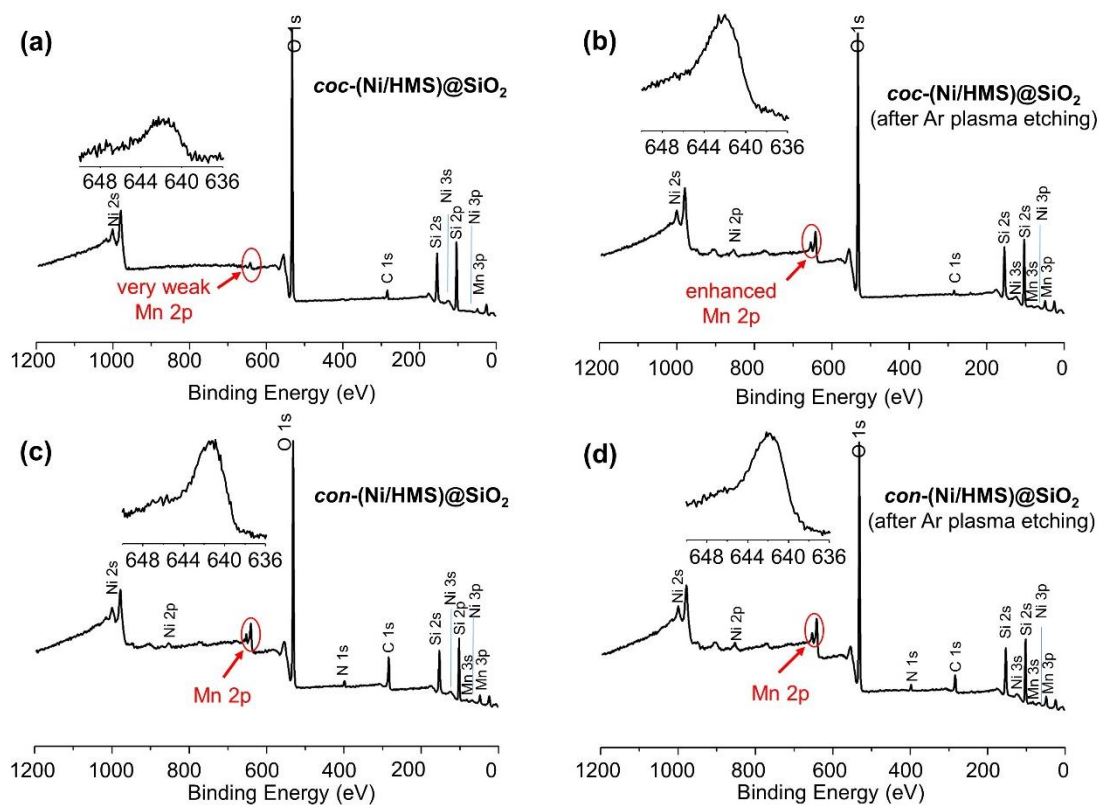

**Figure S3.** XPS analysis of coc-(Ni/HMS)@SiO<sub>2</sub> and conc-(Ni/HMS)@SiO<sub>2</sub> before and after Ar plasma etching. Graphs shown in the insets represent high resolution Mn 2p profiling.

| Nanoparticles                               | $S_{\text{BET}}$<br>( $\text{m}^2\text{g}^{-1}$ ) | $S_{\text{ext}}$<br>( $\text{cm}^3\text{g}^{-1}$ ) | $V_{\text{mic}}$<br>( $\text{cm}^3\text{g}^{-1}$ ) | $V_{\text{tot}}$<br>( $\text{cm}^3\text{g}^{-1}$ ) | $D_{\text{ave}}$<br>(nm) | $D_{\text{BJH Ad}}$<br>(nm) | $D_{\text{BJH De}}$<br>(nm) |
|---------------------------------------------|---------------------------------------------------|----------------------------------------------------|----------------------------------------------------|----------------------------------------------------|--------------------------|-----------------------------|-----------------------------|
| <b><i>conc</i>-(Ni/HMS)@SiO<sub>2</sub></b> | 44.5                                              | 20.2                                               | 0.01                                               | 0.27                                               | 24.48                    | 42.16                       | 30.03                       |
| <b><i>coc</i>-(Ni/HMS)@SiO<sub>2</sub></b>  | 91.0                                              | 64.2                                               | 0.01                                               | 0.57                                               | 25.03                    | 33.21                       | 24.01                       |

$S_{\text{BET}}$ =specific surface area(Brunauer-Emmett-Teller method)  
 $S_{\text{ext}}$ =external surface area by t-method  
 $V_{\text{mic}}$ =micropore volume by t-method  
 $V_{\text{tot}}$ =specific total pore volume  
 $D_{\text{ave}}$ = Average pore diameter( $4V/S_{\text{BET}}$ )  
 $D_{\text{BJH Ad}}$ =Average pore diameter by BJH method on adsorption branch (cage diameter).  
 $D_{\text{BJH De}}$ =Average pore diameter by BJH method on desorption branch (entrance diameter).

**Table S1.** Surface properties of ***coc*-(Ni/HMS)@SiO<sub>2</sub>** and ***conc*-(Ni/HMS)@SiO<sub>2</sub>** measured by N<sub>2</sub> adsorption-desorption isotherms at 77 K.

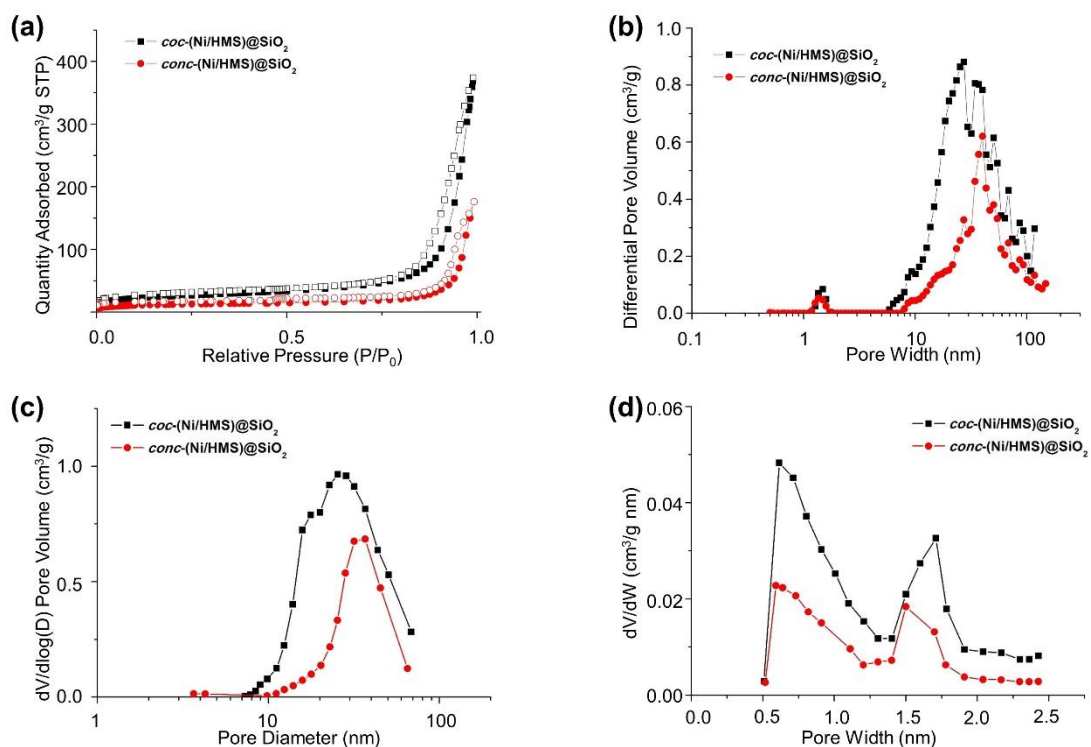

**Figure S4.** Surface properties measurements and analyses of *conc*-(Ni/HMS)@SiO<sub>2</sub> and *coc*-(Ni/HMS)@SiO<sub>2</sub>: N<sub>2</sub> adsorption-desorption isotherms at 77 K (a); pore size distribution obtained by the DFT method, applied to the adsorption branch of the isotherms (b); pore size distribution of the samples obtained by the BJH method on desorption branch (c); pore size distribution (microporous range) obtained by the Horvath Kawazoe(H-K) method (d).

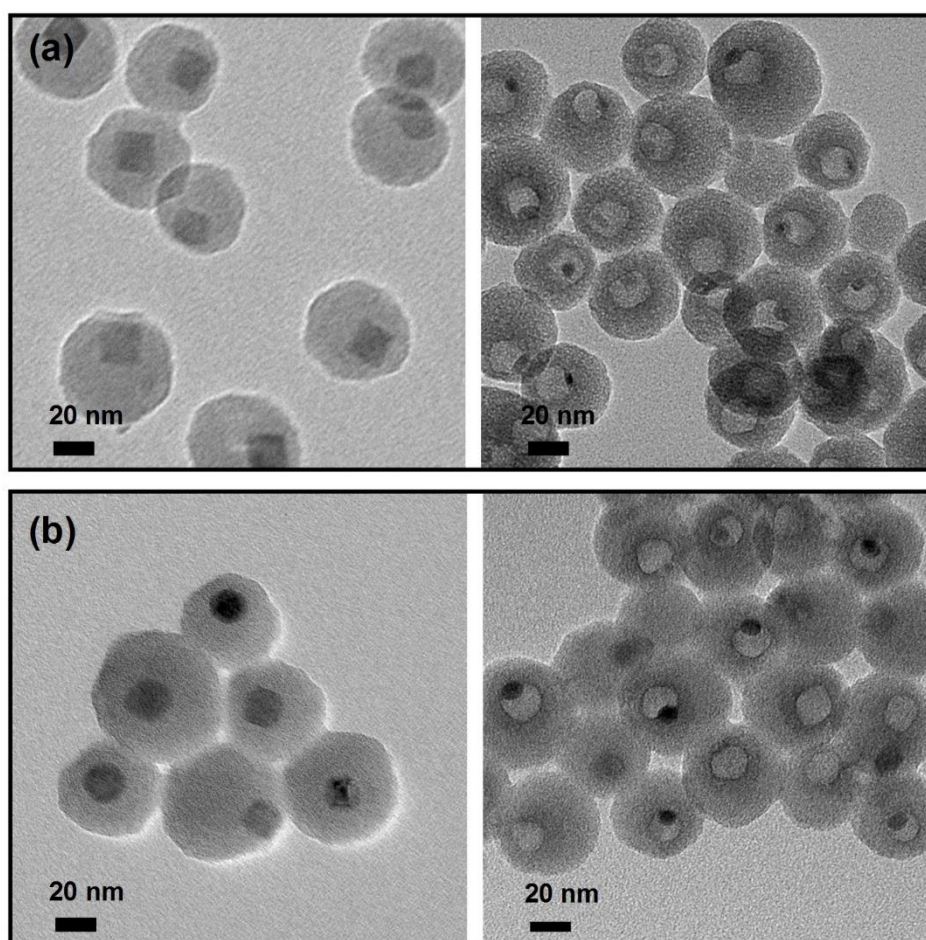

**Figure S5.** (a) TEM images of *asy*-MnO@(SiO<sub>2</sub>/Co<sup>2+</sup>) (left) and *conc*-(Co/HMS)@SiO<sub>2</sub> (right). (b) TEM images of *asy*-MnO@(SiO<sub>2</sub>/Cu<sup>2+</sup>) (left) and *conc*-(Cu/HMS)@SiO<sub>2</sub>.



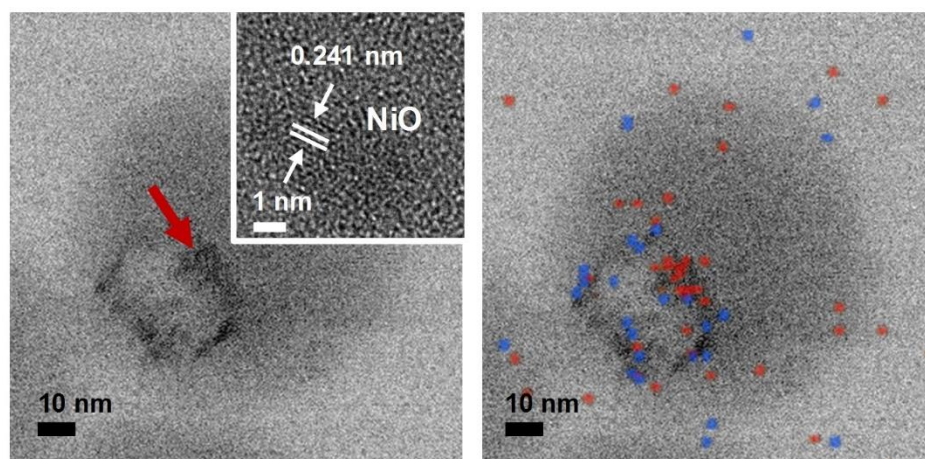

**Figure S6.** TEM image and HRTEM image (inset) of show state of Ni nanoparticle during galvanic replacement reaction on *conc*-(Ni/HMS)@SiO<sub>2</sub> after 1 hour, right TEM image show EDS mapping of Pt (blue) and Ni (red).

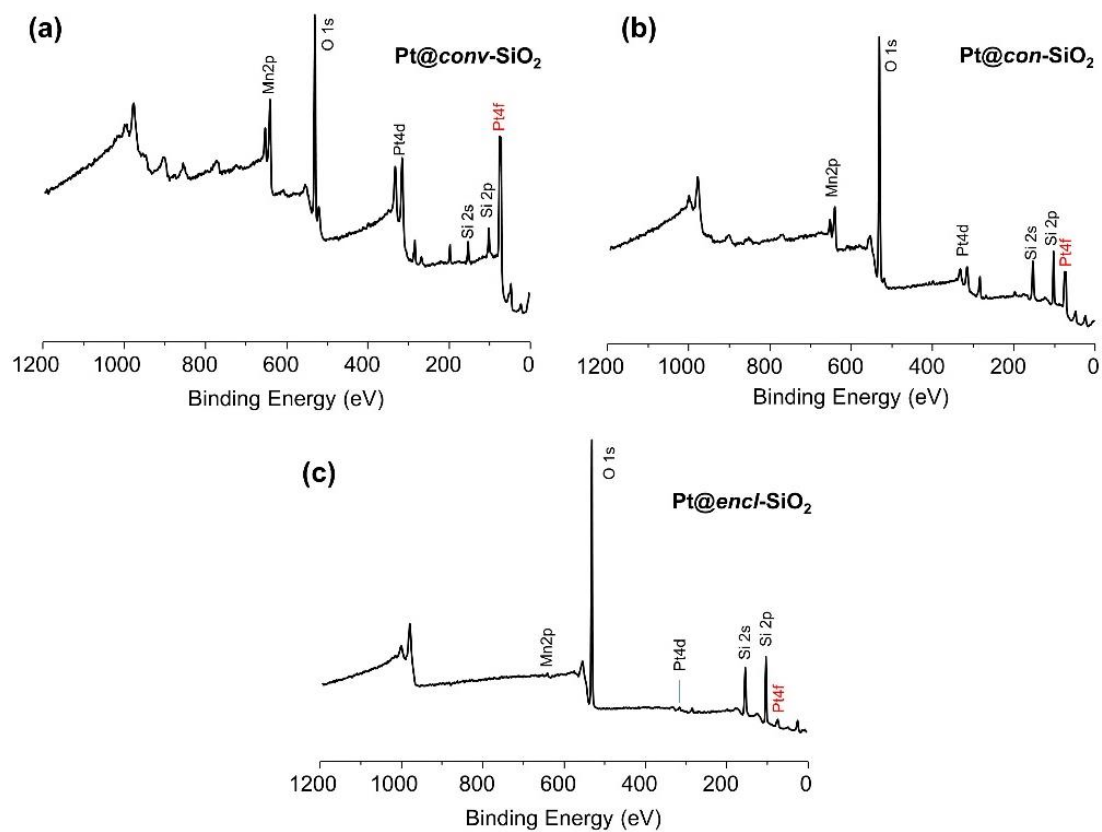

**Figure S7.** XPS survey spectra of **Pt@con-SiO<sub>2</sub>**, **Pt@encl-SiO<sub>2</sub>** and **Pt@conv-SiO<sub>2</sub>**.

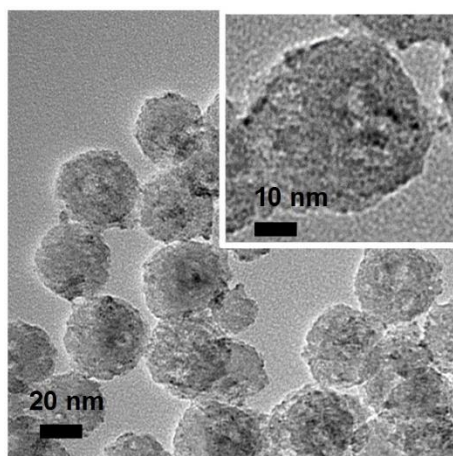

**Figure S8.** TEM image obtained after galvanic replacement reaction performed on *conc*-(Ni/HMS)@SiO<sub>2</sub> at room temperature and at lower pH condition after 24 h, showing sparse formaton of Pt NCs.

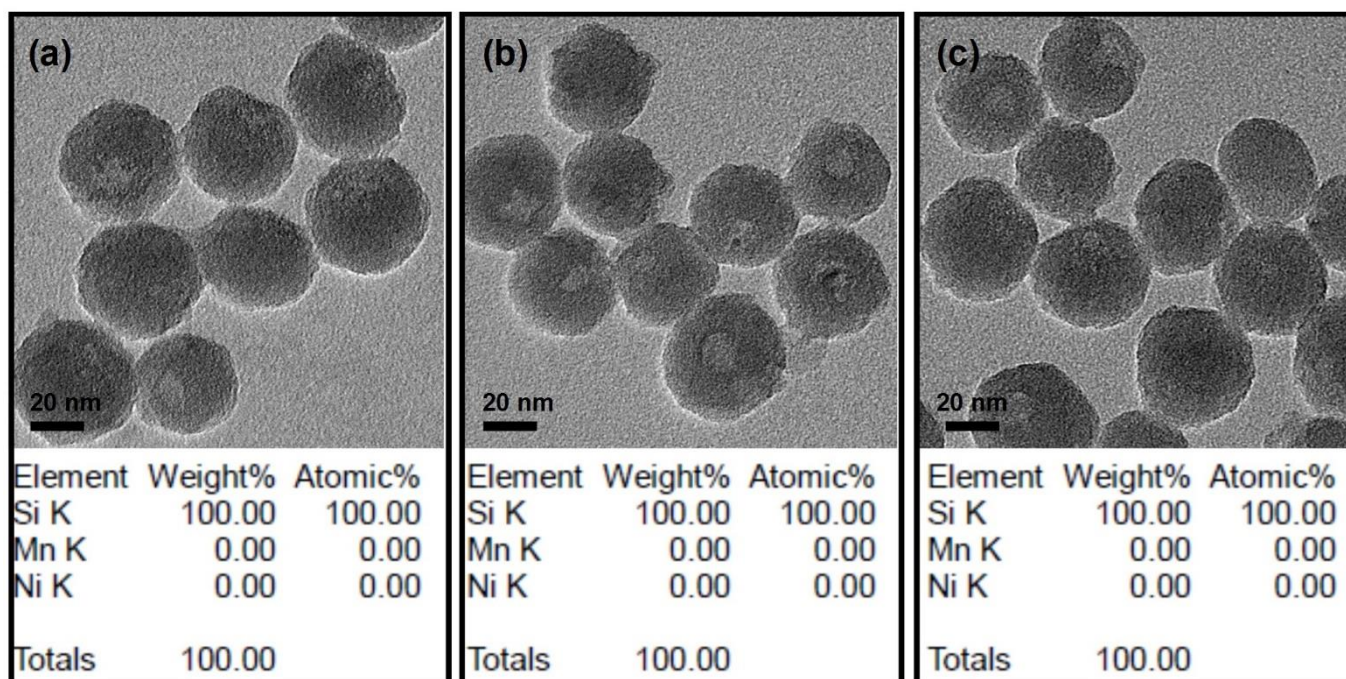

**Figure S9.** TEM images and EDS data of (a) Mn-free *conc*-(Ni/HMS)@SiO<sub>2</sub> and (b) Mn-free *conc*-(Ni/HMS)@SiO<sub>2</sub> after treatment with Na<sub>2</sub>PtCl<sub>4</sub> solution for 2 h and (c) Mn-free *conc*-(Ni/HMS)@SiO<sub>2</sub> after treatment with Na<sub>2</sub>PtCl<sub>4</sub>/MnCl<sub>2</sub> mixed solution for 2 h.

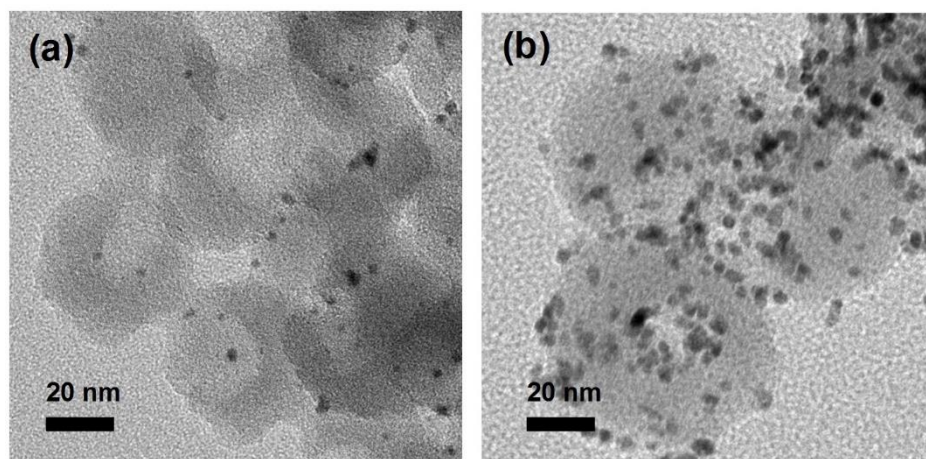

**Figure S10.** TEM images of (a) Mn-free *conc*-(Ni/HMS)@SiO<sub>2</sub> after treated with Na<sub>2</sub>PtCl<sub>4</sub> solution and reducing agent of NaBH<sub>4</sub> at rt for 15 min and (b) Mn-free *conc*-(Ni/HMS)@SiO<sub>2</sub> after treated with Na<sub>2</sub>PtCl<sub>4</sub> and reducing agent ethylene glycol at 100 °C for 15 h.

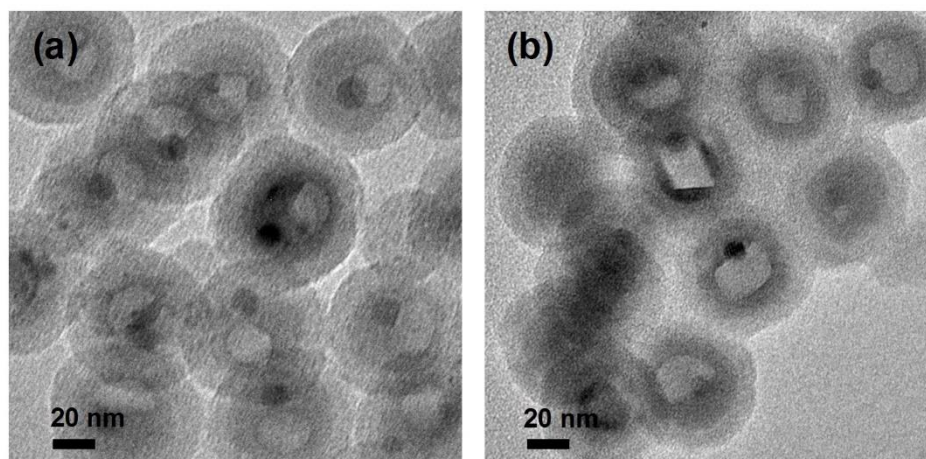

**Figure S11.** TEM images of (a) *coc*-(Ni/HMS)@SiO<sub>2</sub>, (b) after treatment with Na<sub>2</sub>PtCl<sub>4</sub> solution at 50 °C for 2 h.



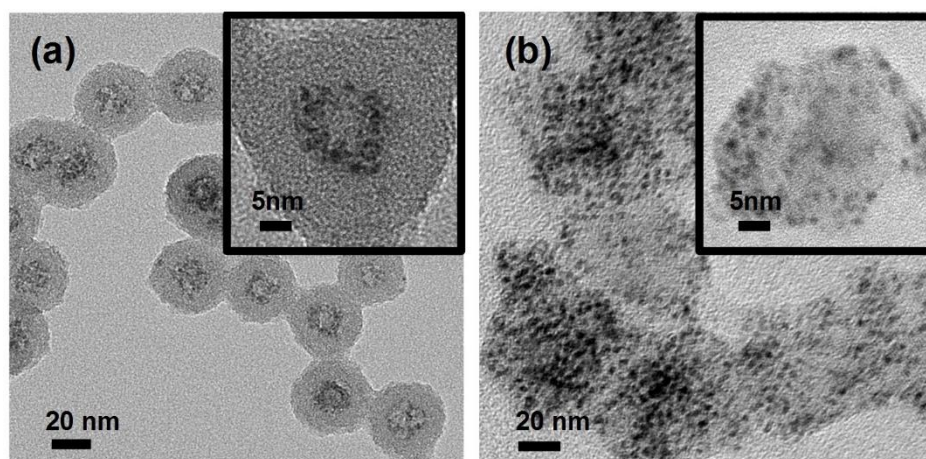

**Figure S12.** TEM images of (a) **Pt@*encl*-SiO<sub>2</sub>** and (b) **Pt@*conv*-SiO<sub>2</sub>**

| Catalysts                             | BET specific surface area (m <sup>2</sup> g <sup>-1</sup> ) | specific total pore volume (cm <sup>3</sup> g <sup>-1</sup> ) | DFT micropore size (nm) | DFT mesopore size (nm) |
|---------------------------------------|-------------------------------------------------------------|---------------------------------------------------------------|-------------------------|------------------------|
| <b>Pt@<i>conc</i>-SiO<sub>2</sub></b> | 123.7                                                       | 0.43                                                          | 1.36                    | 34.3                   |
| <b>Pt@<i>conv</i>-SiO<sub>2</sub></b> | 267.9                                                       | 0.69                                                          | 1.36                    | 27.3                   |
| <b>Pt@<i>encl</i>-SiO<sub>2</sub></b> | 347.0                                                       | 0.74                                                          | 1.36                    | 27.3                   |

**Table S2.** Textural properties of the three catalysts.



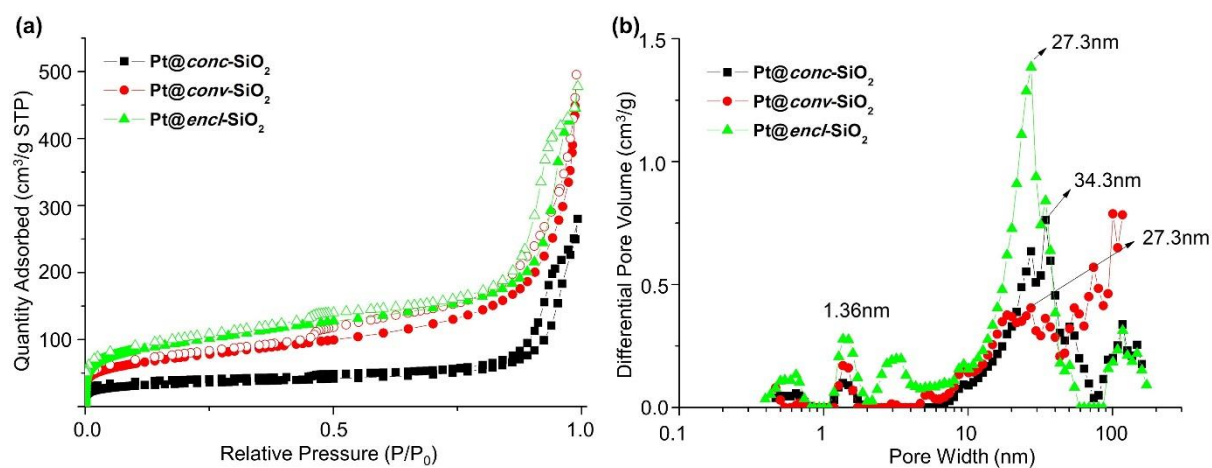

**Figure S13.** (a)  $\text{N}_2$  adsorption-desorption isotherms of the catalysts at 77 K. (b) Pore size distribution of  $\text{Pt@conc-SiO}_2$ ,  $\text{Pt@encl-SiO}_2$  and  $\text{Pt@conv-SiO}_2$  obtained by the DFT method, applied to the adsorption branch of the isotherms (left).

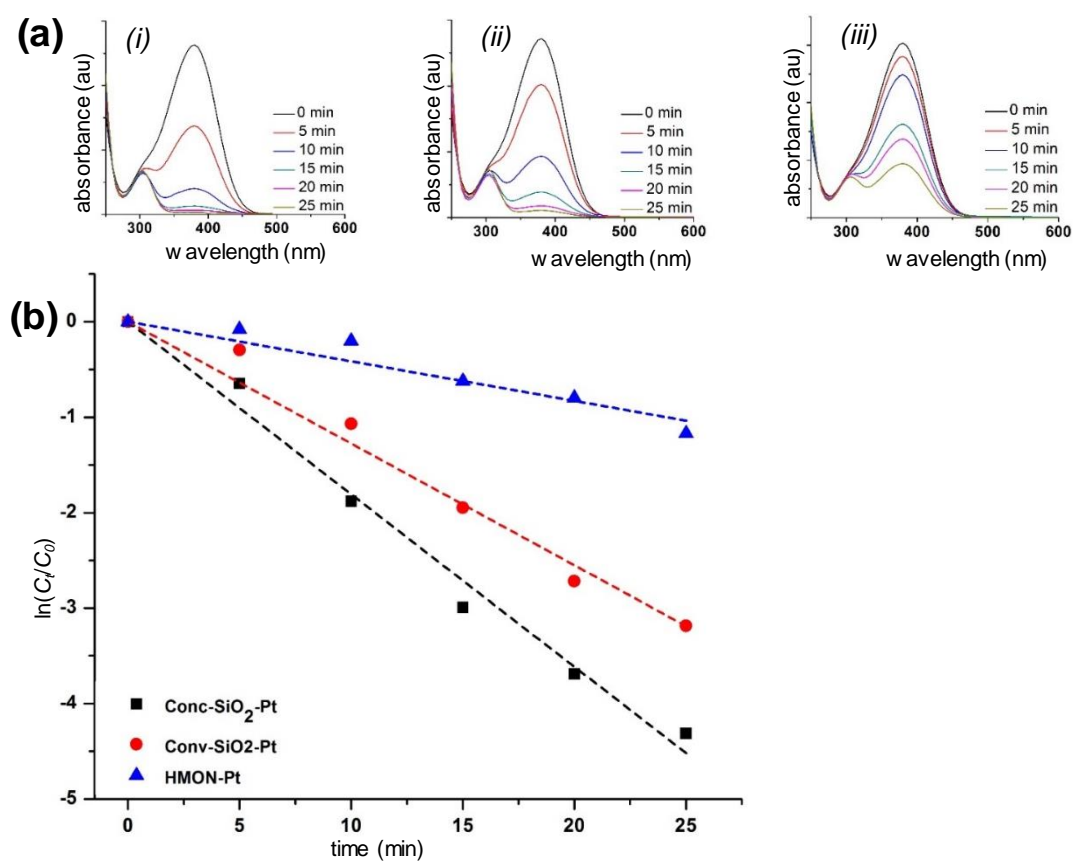

**Figure S14.** (a) Time-dependent UV-Vis spectra for the reduction of 4-nitroaniline using **Pt@*conc*-SiO<sub>2</sub>** (i), **Pt@*conv*-SiO<sub>2</sub>** (ii), **Pt@*encl*-SiO<sub>2</sub>** (iii). (b) Plots of  $\ln(C_t/C_0)$  vs reaction time using different catalysts.

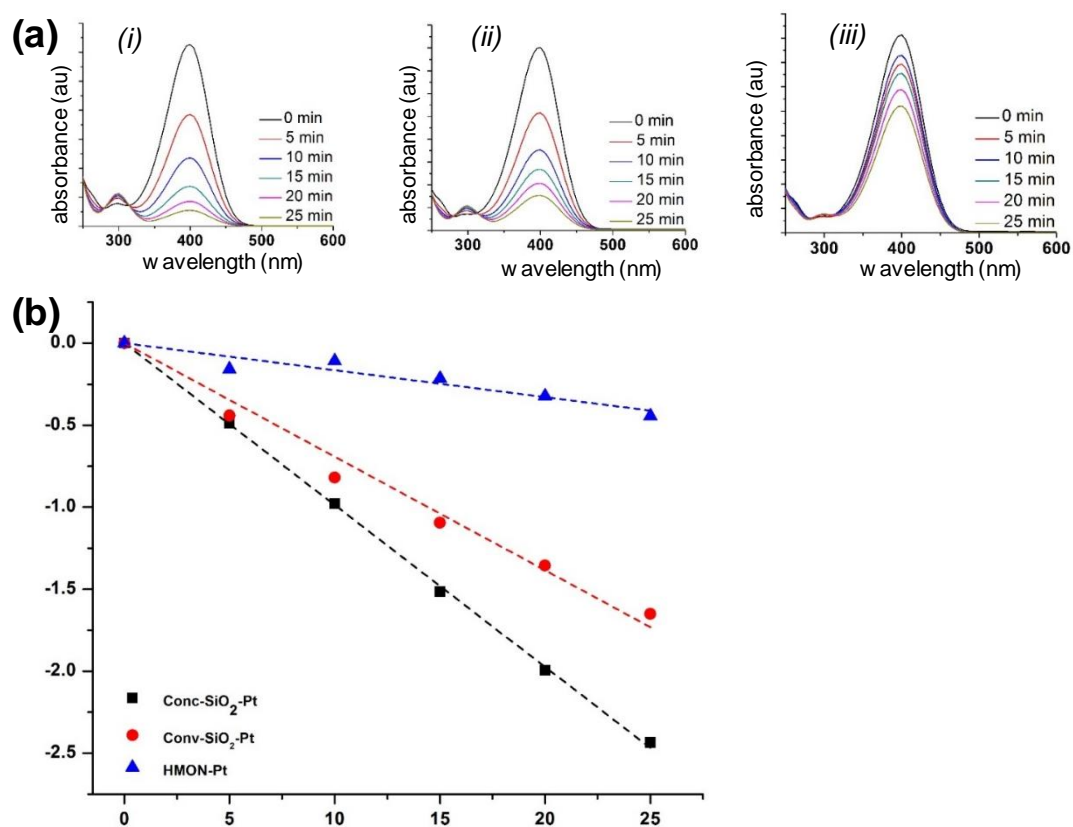

**Figure S15.** (a) Time-dependent UV-Vis spectra for the reduction of 4-nitrophenol using **Pt@*conc*-SiO<sub>2</sub>** (i), **Pt@*conv*-SiO<sub>2</sub>** (ii), **Pt@*encl*-SiO<sub>2</sub>** (iii). (b) Plots of  $\ln(C_t/C_0)$  vs reaction time using different catalysts.

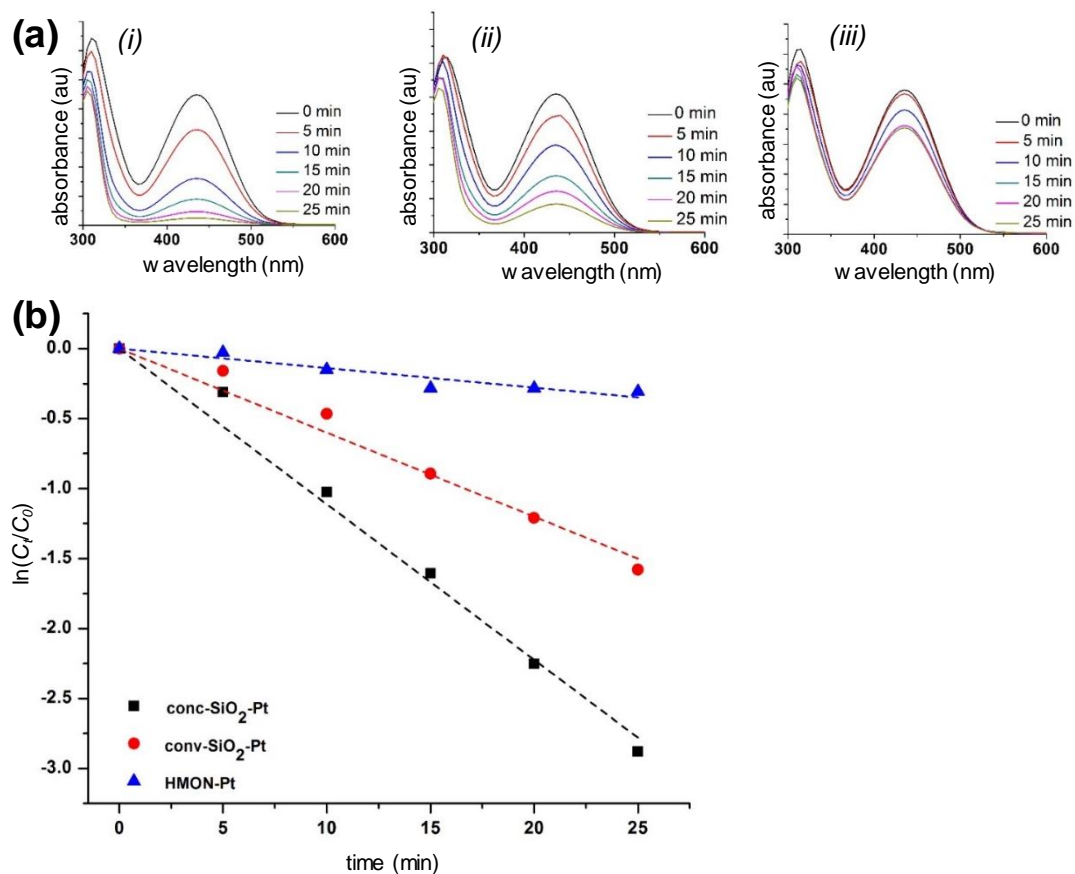

**Figure S16.** (a) Time-dependent UV-Vis spectra for the reduction of 4'-Amino-5'-nitrobenzo-15-crown-5 using **Pt@conc-SiO<sub>2</sub>** (i), **Pt@conv-SiO<sub>2</sub>** (ii), **Pt@encl-SiO<sub>2</sub>** (iii). (b) Plots of  $\ln(C_t/C_0)$  vs reaction time using different catalysts.

| Substrate                                                                                         | Pt@ <i>conc</i> -SiO <sub>2</sub> |                                       | Pt@ <i>conv</i> -SiO <sub>2</sub> |                                       | Pt@ <i>encl</i> -SiO <sub>2</sub> |                                       |
|---------------------------------------------------------------------------------------------------|-----------------------------------|---------------------------------------|-----------------------------------|---------------------------------------|-----------------------------------|---------------------------------------|
|                                                                                                   | TON                               | TOF <sub>5</sub> (min <sup>-1</sup> ) | TON                               | TOF <sub>5</sub> (min <sup>-1</sup> ) | TON                               | TOF <sub>5</sub> (min <sup>-1</sup> ) |
| 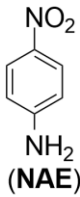<br><b>(NAE)</b> | 995                               | 95                                    | 960                               | 64                                    | 660                               | 9                                     |
| <br><b>(NPL)</b> | 910                               | 77                                    | 810                               | 71                                    | 360                               | 20                                    |
| <br><b>(NCN)</b> | 950                               | 53                                    | 790                               | 30                                    | 260                               | 5                                     |

**Table S3.** Estimated TON and TOF values for the reduction of NAE, NPL and NCN using all three catalysts. TON values were obtained from the % conversion of the substrates at 25 min of reaction time using 0.1 mol% of catalyst. TOF<sub>5</sub> value were obtained from the % conversion of the substrates at 5 min of the reaction time.

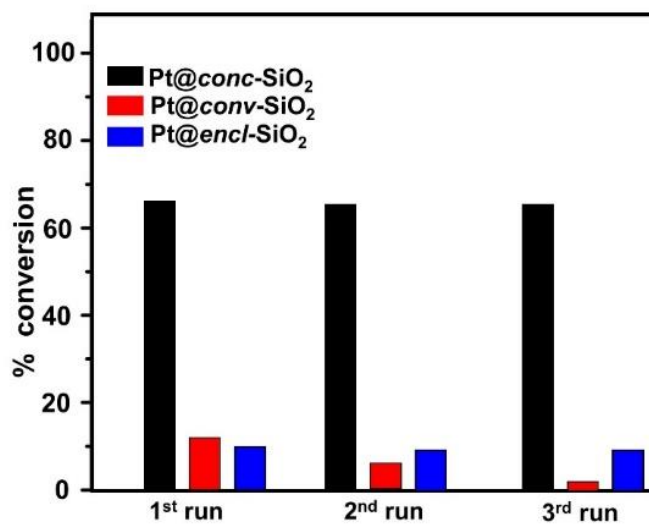

**Figure S17.** Stability test and comparison of conversion yields (%) for the reduction of 4-nitroaniline using recycled catalysts (0.001 mol%).

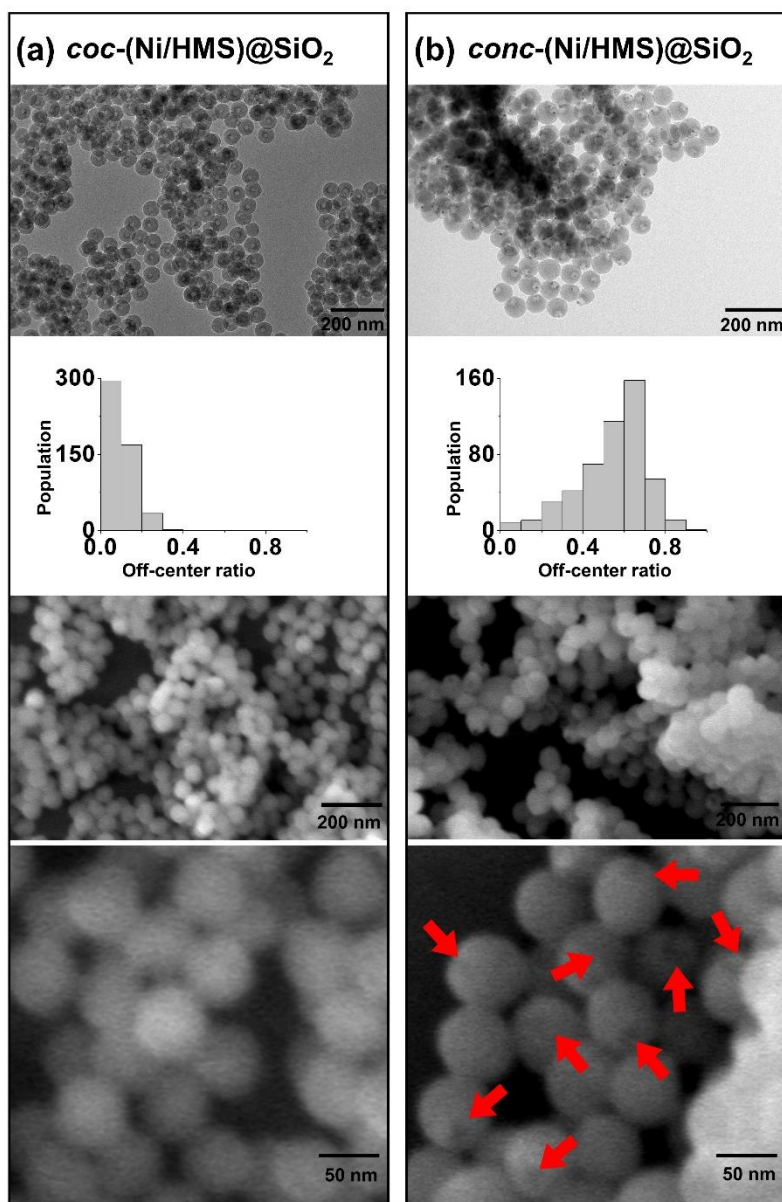

**Figure S18.** (a-b) Low-magnification TEM, nanoparticle-population-distribution of off-center ratios obtained from TEM images, low magnification SEM and high magnification SEM of *coc*-(Ni/HMS)@SiO<sub>2</sub> and *conc*-(Ni/HMS)@SiO<sub>2</sub>. Red arrows designate the visible open-mouthed cavities in SEM images.
